# Supplementary material for: Impact of Hoarding and Obsessive–Compulsive Disorder Symptomatology on Quality of Life and Their Interaction With Depression Symptomatology
Source: PubMed Central journal article supplement (PMC9376220; doi:10.3389/fpsyg.2022.926048), 2022-08-01
Supplement: Data_Sheet_1.pdf [file Data_Sheet_1.pdf]

**Supplemental Table 1.** Summary of QoL studies examining hoarding behavior.

| Study                                     | Sample                                                                              | Quality of Life Measure                                                                               | Findings                                                                                                                                                                                                                                           |
|-------------------------------------------|-------------------------------------------------------------------------------------|-------------------------------------------------------------------------------------------------------|----------------------------------------------------------------------------------------------------------------------------------------------------------------------------------------------------------------------------------------------------|
| <b>Studies in primary OCD populations</b> |                                                                                     |                                                                                                       |                                                                                                                                                                                                                                                    |
| Huppert (2009)                            | 15 history of OCD, 32 current OCD, 19 OCD comorbid with other psychiatric diagnoses | Quality of Life Enjoyment and Satisfaction Questionnaire (QLESQ), Short-Form Health Survey-36 (SF-36) | Hoarding symptom subtype on the OCI-R correlated with impairment on the QLESQ total, social, and family scales and the SF-36 social and work scales                                                                                                |
| Fontanelle (2010)                         | 53 OCD patients                                                                     | SF-36                                                                                                 | Hoarding, depressive symptoms, and employment status predicted 62% of the variance in social functioning, although depression accounted for most of this variance                                                                                  |
| Albert (2010)                             | 151 OCD patients                                                                    | SF-36                                                                                                 | Hoarding obsessions/compulsions factor on the YBOCS Symptom Checklist was not significantly related to any SF-36 subscales                                                                                                                         |
| Saxena (2011)                             | 34 OCD patients with compulsive hoarding, 137 OCD patients without hoarding         | Lehman Quality of Life Interview-Short Form                                                           | Hoarding group scored significantly lower on satisfaction with safety and living arrangements and higher on victimization, and trended towards lower scores on satisfaction with living situation; depression scores did not differ between groups |
| Subramaniam (2014)                        | 175 OCD without hoarding, 122 hoarding without OCD, 55 OCD with hoarding            | EuroQol 5 (EQ-5D)                                                                                     | Patients with both OCD and hoarding had a lower mean EQ-5D index (indicating worse QoL) than OCD-only or hoarding-only patients and were more likely to report problems in the mobility and pain domains                                           |
| Schwartzman (2017)                        | 325 treatment-seeking patients with primary OCD                                     | QLESQ                                                                                                 | Hoarding symptoms were associated with decreased household-related QoL, above and beyond OCD and depression severity                                                                                                                               |
| <b>Studies in primary HD populations</b>  |                                                                                     |                                                                                                       |                                                                                                                                                                                                                                                    |
| Ong (2016)                                | 102 HD patients                                                                     | QLESQ                                                                                                 | HD severity was negatively correlated with QoL, but HD severity and QoL were no longer significantly related after controlling for anxiety and depression                                                                                          |

|              |                                  |       |                                                                                                                                                                                                                                                                                                                            |
|--------------|----------------------------------|-------|----------------------------------------------------------------------------------------------------------------------------------------------------------------------------------------------------------------------------------------------------------------------------------------------------------------------------|
| Tolin (2019) | 54 treatment-seeking HD patients | SF-36 | HD group scored significantly lower than age- and sex-matched healthy controls on emotional well-being, role limitations due to emotional problems, vitality, and general health; the SI-R negatively predicted multiple domains of QoL in the whole sample, but was only significant for vitality QoL within the HD group |
|--------------|----------------------------------|-------|----------------------------------------------------------------------------------------------------------------------------------------------------------------------------------------------------------------------------------------------------------------------------------------------------------------------------|

**Supplemental Table 2.** Factor loadings and component domains for QoL groupings using factor analysis of the QoLI.

| <i>QoLI domain</i> | <i>QoLI domain components</i> | Success Factor Loading | Enrichment Factor Loading | Environment Factor Loading | Family Factor Loading |
|--------------------|-------------------------------|------------------------|---------------------------|----------------------------|-----------------------|
| Success            | Health                        | <b><u>0.74</u></b>     | 0.07                      | 0.01                       | -0.10                 |
|                    | Self-Esteem                   | <b><u>0.71</u></b>     | 0.19                      | -0.03                      | 0.00                  |
|                    | Goals and Values              | <b><u>0.65</u></b>     | 0.20                      | -0.03                      | 0.08                  |
|                    | Money                         | <b><u>0.76</u></b>     | -0.14                     | 0.13                       | 0.04                  |
|                    | Work                          | <b><u>0.63</u></b>     | -0.02                     | 0.06                       | 0.15                  |
| Enrichment         | Play                          | 0.36                   | <b><u>0.50</u></b>        | 0.04                       | -0.05                 |
|                    | Learning                      | 0.21                   | <b><u>0.75</u></b>        | -0.08                      | -0.11                 |
|                    | Creativity                    | -0.01                  | <b><u>0.88</u></b>        | -0.02                      | -0.20                 |
|                    | Helping                       | -0.02                  | <b><u>0.55</u></b>        | -0.05                      | 0.32                  |
|                    | Friends                       | -0.08                  | <b><u>0.40</u></b>        | 0.18                       | 0.30                  |
| Environment        | Home                          | 0.22                   | -0.03                     | <b><u>0.51</u></b>         | 0.18                  |
|                    | Neighborhood                  | 0.04                   | -0.08                     | <b><u>0.96</u></b>         | -0.12                 |
|                    | Community                     | 0.01                   | 0.01                      | <b><u>0.89</u></b>         | -0.08                 |
| Family             | Love                          | 0.29                   | -0.07                     | -0.12                      | <b><u>0.66</u></b>    |
|                    | Children                      | 0.01                   | -0.18                     | -0.10                      | <b><u>0.92</u></b>    |
|                    | Relatives                     | -0.19                  | 0.25                      | 0.30                       | <b><u>0.41</u></b>    |

**Supplementary Table 3.** Mean QoL scores (SD in parentheses) by domain and gender.

| QoL Domain  | Male        | Female      | t     | p      |
|-------------|-------------|-------------|-------|--------|
| Total       | 1.53 (1.92) | 1.61 (1.85) | -0.98 | 0.33   |
| Success     | 1.02 (2.32) | 0.88 (2.27) | 1.36  | 0.18   |
| Enrichment  | 1.58 (1.82) | 1.59 (1.95) | -0.18 | 0.86   |
| Environment | 1.35 (2.05) | 1.59 (2.15) | -2.58 | 0.01   |
| Family      | 1.85 (2.26) | 2.38 (2.29) | -5.21 | <0.001 |

**Supplemental Table 4.** Bivariate Pearson correlations between QoL groupings and psychiatric symptom subscales across the entire sample (n = 2100).

|                 | HRS-SR | OCI-R  | PHQ-9  | GAD-7  |
|-----------------|--------|--------|--------|--------|
| Overall QoL     | -0.195 | -0.178 | -0.568 | -0.466 |
| Success QoL     | -0.175 | -0.153 | -0.574 | -0.485 |
| Enrichment QoL  | -0.142 | -0.150 | -0.452 | -0.382 |
| Environment QoL | -0.145 | -0.123 | -0.337 | -0.273 |
| Family QoL      | -0.132 | -0.108 | -0.360 | -0.263 |
| HRS-SR          | 1      | 0.601  | 0.471  | 0.441  |
| OCI-R           | 0.601  | 1      | 0.515  | 0.562  |
| PHQ-9           | 0.471  | 0.515  | 1      | 0.814  |
| GAD-7           | 0.441  | 0.562  | 0.814  | 1      |

\*All bivariate correlation pairs were significant at the  $p < 0.01$  (2-tailed) level.

**Supplemental Table 5.** Comparison of mean QoL and psychiatric symptomatology between hoarding and non-hoarding subgroups (SD in parentheses), based on a cutoff of 14 on the HRS-SR (controlling for covariates).

|                    | Hoarding<br>(n = 392,<br>18.7% of<br>sample) | Non-hoarding<br>(n = 1708,<br>81.3% of<br>sample) | F-value | p-value |
|--------------------|----------------------------------------------|---------------------------------------------------|---------|---------|
| Overall QoL        | 0.97 (1.87)                                  | 1.72 (1.85)                                       | 38.59   | <0.001  |
| Success QoL        | 0.29 (2.37)                                  | 1.09 (2.24)                                       | 25.74   | <0.001  |
| Enrichment<br>QoL  | 1.13 (2.03)                                  | 1.69 (1.85)                                       | 21.27   | <0.001  |
| Environment<br>QoL | 0.95 (2.09)                                  | 1.62 (2.10)                                       | 23.68   | <0.001  |
| Family QoL         | 1.68 (2.22)                                  | 2.27 (2.30)                                       | 17.71   | <0.001  |
| HRS-SR             | 21.05 (5.40)                                 | 3.69 (3.89)                                       | 5265.04 | <0.001  |
| OCI-R              | 22.86 (12.84)                                | 8.54 (8.05)                                       | 717.53  | <0.001  |
| PHQ-9              | 10.73 (6.82)                                 | 4.82 (5.19)                                       | 325.75  | <0.001  |
| GAD-7              | 9.07 (5.83)                                  | 4.22 (4.75)                                       | 269.54  | <0.001  |

**Supplemental Table 6.** Comparison of mean QoL and psychiatric symptomatology between hoarding and depression subgroups (SD in parentheses), based on cutoffs of 14 on the HRS-SR and 10 on the PHQ-9, controlling for covariates.

|                 | Neither (n = 1428)       | Hoarding w/o depression (n = 177) | Depression w/o hoarding (n = 280) | Hoarding + depression (n = 215) |
|-----------------|--------------------------|-----------------------------------|-----------------------------------|---------------------------------|
| Overall QoL     | 2.12 (1.62)              | 1.57 (1.54)                       | -0.34 (1.61)                      | 0.48 (1.98)                     |
| Success QoL     | 1.58 (1.96)              | 1.02 (1.94)                       | -1.45 (1.84)                      | -0.30 (2.53)                    |
| Enrichment QoL  | 2.01 (1.68) <sup>a</sup> | 1.65 (1.72) <sup>a</sup>          | 0.05 (1.82)                       | 0.70 (2.16)                     |
| Environment QoL | 1.89 (1.99)              | 1.23 (1.85) <sup>a</sup>          | 0.23 (2.09) <sup>b</sup>          | 0.72 (2.24) <sup>ab</sup>       |
| Family QoL      | 2.59 (2.18) <sup>a</sup> | 2.18 (2.13) <sup>a</sup>          | 0.66 (2.22)                       | 1.27 (2.21)                     |
| HRS-SR          | 3.34 (3.73)              | 19.25 (4.35)                      | 5.48 (4.23)                       | 22.53 (5.73)                    |
| OCI-R           | 7.43 (7.21)              | 17.49 (10.59)                     | 14.22 (9.58)                      | 27.28 (12.86)                   |
| PHQ-9           | 2.94 (2.73)              | 4.54 (3.03)                       | 14.40 (4.09)                      | 15.82 (4.44)                    |
| GAD-7           | 2.89 (3.37)              | 4.85 (4.22)                       | 10.95 (5.03)                      | 12.54 (4.55)                    |

\*All post-hoc pairwise comparisons significantly differed at the  $p < 0.05$  level, except the pairs denoted by letters within each outcome category row.

**Supplemental Table 7.** Comparison of mean QoL and psychiatric symptomatology between hoarding and OCD subgroups (SD in parentheses), based on cutoffs of 14 on the HRS-SR and 21 on the OCI-R, controlling for covariates.

|                 | Neither (n = 1550)        | Hoarding w/o OCD (n = 180) | OCD w/o hoarding (n = 158) | Hoarding + OCD (n = 212)   |
|-----------------|---------------------------|----------------------------|----------------------------|----------------------------|
| Overall QoL     | 1.78 (1.83)               | 0.83 (1.62) <sup>ab</sup>  | 1.06 (1.97) <sup>ac</sup>  | 1.09 (2.05) <sup>bc</sup>  |
| Success QoL     | 1.17 (2.21)               | 0.04 (1.95) <sup>ab</sup>  | 0.28 (2.37) <sup>ac</sup>  | 0.51 (2.66) <sup>bc</sup>  |
| Enrichment QoL  | 1.76 (1.82) <sup>a</sup>  | 0.92 (1.85) <sup>bc</sup>  | 1.00 (2.06) <sup>bd</sup>  | 1.31 (2.15) <sup>acd</sup> |
| Environment QoL | 1.67 (2.07)               | 0.88 (2.01) <sup>ab</sup>  | 1.07 (2.32) <sup>ac</sup>  | 1.01 (2.15) <sup>bc</sup>  |
| Family QoL      | 2.30 (2.29) <sup>ab</sup> | 1.66 (2.29) <sup>cd</sup>  | 1.96 (2.39) <sup>ace</sup> | 1.70 (2.16) <sup>bde</sup> |
| HRS-SR          | 3.55 (3.82)               | 18.99 (4.61)               | 5.11 (4.32)                | 22.80 (5.42)               |
| OCI-R           | 6.64 (5.29)               | 11.16 (5.23)               | 27.15 (6.62)               | 32.79 (8.15)               |
| PHQ-9           | 4.41 (4.84)               | 8.36 (6.18) <sup>a</sup>   | 8.86 (6.63) <sup>a</sup>   | 12.74 (6.71)               |
| GAD-7           | 3.75 (4.36)               | 7.07 (5.40)                | 8.77 (5.83)                | 10.76 (5.65)               |

\*All post-hoc pairwise comparisons significantly differed at the  $p < 0.05$  level, except the pairs denoted by letters within each outcome category row.



**Supplemental Table 8.** Multiple linear regression including the HRS-SR as a predictor of QoL in depressed and non-depressed groups based on a PHQ-9 cutoff of 10. Each overall model (including covariates) was statistically significant ( $p < 0.05$ ). Unstandardized beta coefficients are given in parentheses.

| QoL Domain  | HRS-SR Beta Coefficient (Standardized, Unstandardized) (depressed group, n = 495) | t    | p-value | Adjusted R-Square, F-value | HRS-SR Beta Coefficient (Standardized, Unstandardized) (non-depressed group, n = 1605) | t     | p-value | Adjusted R-Square, F-value |
|-------------|-----------------------------------------------------------------------------------|------|---------|----------------------------|----------------------------------------------------------------------------------------|-------|---------|----------------------------|
| Overall     | 0.252 (0.047)                                                                     | 5.93 | <0.001  | 0.148, 11.767              | -0.149 (-0.038)                                                                        | -6.17 | <0.001  | 0.087, 20.057              |
| Success     | 0.260 (0.059)                                                                     | 6.14 | <0.001  | 0.156, 12.413              | -0.115 (-0.036)                                                                        | -4.76 | <0.001  | 0.087, 20.091              |
| Enrichment  | 0.194 (0.040)                                                                     | 4.33 | <0.001  | 0.052, 4.407               | -0.098 (-0.026)                                                                        | -3.91 | <0.001  | 0.018, 4.628               |
| Environment | 0.135 (0.030)                                                                     | 3.01 | 0.003   | 0.057, 4.721               | -0.127 (-0.040)                                                                        | -5.21 | <0.001  | 0.060, 13.791              |
| Family      | 0.167 (0.038)                                                                     | 3.85 | <0.001  | 0.119, 9.373               | -0.098 (-0.034)                                                                        | -4.28 | <0.001  | 0.180, 44.953              |

**Supplemental Table 9.** Multiple linear regression comparing the HRS-SR and OCI-R as predictors of home, neighborhood, community, love, children, and relatives QoL subcomponents in separate models (covariates not shown). Unstandardized beta coefficients are given in parentheses.

| QoL Subcomponent | OCI-R Beta Coefficient (Standardized, Unstandardized) | t     | p      | Adjusted R-Square, F-value | HRS-SR Beta Coefficient (Standardized, Unstandardized) | t     | p      | Adjusted R-Square, F-value |
|------------------|-------------------------------------------------------|-------|--------|----------------------------|--------------------------------------------------------|-------|--------|----------------------------|
| Home             | -0.101 (-0.028)                                       | -4.63 | <0.001 | 0.062, 18.22               | -0.153 (-0.057)                                        | -7.16 | <0.001 | 0.075, 22.16               |
| Neighborhood     | -0.08 (-0.018)                                        | -3.65 | <0.001 | 0.036, 10.69               | -0.094 (-0.029)                                        | -4.34 | <0.001 | 0.038, 11.41               |
| Community        | -0.072 (-0.015)                                       | -3.28 | 0.001  | 0.033, 9.84                | -0.047 (-0.013)                                        | -2.14 | 0.03   | 0.030, 9.05                |
| Love             | -0.076 (-0.026)                                       | -3.72 | <0.001 | 0.177, 57.46               | -0.088 (-0.040)                                        | -4.40 | <0.001 | 0.179, 58.28               |
| Children         | -0.039 (-0.011)                                       | -1.85 | 0.07   | 0.128, 39.35               | -0.052 (-0.020)                                        | -2.52 | 0.01   | 0.129, 39.77               |
| Relatives        | -0.092 (-0.023)                                       | -4.14 | <0.001 | 0.012, 4.28                | -0.109 (-0.036)                                        | -4.94 | <0.001 | 0.016, 5.19                |

**Supplemental Table 10.** Multiple linear regression including both the HRS-SR and OCI-R in the same model as predictors of home, neighborhood, community, love, children, and relatives QoL subcomponents (covariates not shown). Unstandardized beta coefficients are given in parentheses.

| QoL Subcomponent | OCI-R Beta Coefficient (Standardized, Unstandardized) | t     | p    | HRS-SR Beta Coefficient (Standardized, Unstandardized) | t     | p      | Adjusted R-Square, F-value |
|------------------|-------------------------------------------------------|-------|------|--------------------------------------------------------|-------|--------|----------------------------|
| Home             | -0.015 (-0.004)                                       | -0.58 | 0.56 | -0.144 (-0.054)                                        | -5.46 | <0.001 | 0.074, 19.73               |
| Neighborhood     | -0.037 (-0.008)                                       | -1.37 | 0.17 | -0.073 (-0.022)                                        | -2.71 | 0.007  | 0.039, 10.35               |
| Community        | -0.068 (-0.014)                                       | -2.49 | 0.01 | -0.007 (-0.002)                                        | -0.28 | 0.78   | 0.032, 8.76                |
| Love             | -0.036 (-0.012)                                       | -1.42 | 0.16 | -0.068 (-0.031)                                        | -2.73 | 0.006  | 0.180, 52.06               |
| Children         | -0.012 (-0.003)                                       | -0.46 | 0.64 | -0.045 (-0.018)                                        | -1.77 | 0.08   | 0.128, 35.36               |
| Relatives        | -0.043 (-0.011)                                       | -1.55 | 0.12 | -0.084 (-0.028)                                        | -3.09 | 0.002  | 0.016, 4.88                |

**Supplementary Table 11.** Multiple linear regression including both the HRS-SR and OCI-R in the same model, with the addition of the PHQ-9, as predictors of home, neighborhood, community, love, children, and relatives QoL subcomponents (covariates not shown). Unstandardized beta coefficients are given in parentheses.

| QoL Subcomponent | OCI-R Beta Coefficient (Standardized, Unstandardized) | t    | p      | HRS-SR Beta Coefficient (Standardized, Unstandardized) | t     | p    | PHQ-9 Beta Coefficient (Standardized, Unstandardized) | t      | p      | Adjusted R-Square, F-value |
|------------------|-------------------------------------------------------|------|--------|--------------------------------------------------------|-------|------|-------------------------------------------------------|--------|--------|----------------------------|
| Home             | 0.112 (0.031)                                         | 4.17 | <0.001 | -0.056 (-0.021)                                        | -2.15 | 0.03 | -0.361 (-0.180)                                       | -14.61 | <0.001 | 0.160, 40.90               |
| Neighborhood     | 0.047 (0.011)                                         | 1.66 | 0.10   | -0.015 (-0.004)                                        | -0.54 | 0.59 | -0.238 (-0.096)                                       | -9.19  | <0.001 | 0.075, 18.12               |
| Community        | 0.010 (0.002)                                         | 0.37 | 0.72   | 0.047 (0.013)                                          | 1.72  | 0.09 | -0.222 (-0.084)                                       | -8.50  | <0.001 | 0.064, 15.37               |
| Love             | 0.075 (0.025)                                         | 2.96 | 0.003  | 0.009 (0.004)                                          | 0.37  | 0.71 | -0.314 (-0.190)                                       | -13.39 | <0.001 | 0.244, 68.79               |
| Children         | 0.062 (0.018)                                         | 2.31 | 0.02   | 0.006 (0.002)                                          | 0.24  | 0.81 | -0.210 (-0.108)                                       | -8.47  | <0.001 | 0.157, 40.07               |
| Relatives        | 0.067 (0.017)                                         | 2.40 | 0.02   | -0.008 (-0.003)                                        | -0.29 | 0.77 | -0.312 (-0.139)                                       | -12.04 | <0.001 | 0.080, 19.18               |
